# Supplementary material for: Long-term antifouling surfaces for urinary catheters
Source: Royal Society of Chemistry journal article supplement (doi:10.1039/d4tb00311j), 2024-01-01
Supplement: d4tb00311j1.pdf [file d4tb00311j1.pdf]

## Supporting Information

### Table of Contents

|                                                                                     |    |
|-------------------------------------------------------------------------------------|----|
| 1. Plasma polymerization system of PEG-like thin films.....                         | S1 |
| 2. FTIR analysis of PEG-like thin films.....                                        | S2 |
| 3. Crosslink & Adhesiveness Studies.....                                            | S3 |
| 4. XPS Analysis of PEG-like thin films.....                                         | S4 |
| 5. Estimation of surface energy for PEG-like thin films.....                        | S5 |
| 6. Antimicrobial/Antifouling Properties of PEG-like thin films & SPSS Analysis..... | S6 |

## S1. Plasma polymerization system of PEG-like thin films

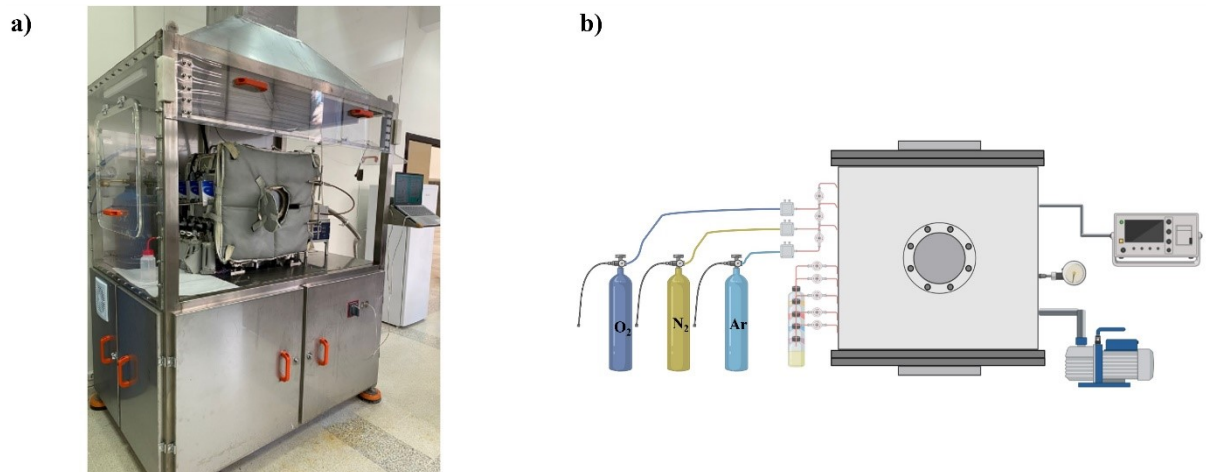

**Fig. S1-1.** a) Picture of PE-CVD system b) schematic drawing of PE-CVD reactor

Plasma Enhanced Chemical Vapor Deposition (PE-CVD) is a technique that enables functional polymeric thin film production at a moderate pressure and room temperature. As seen in Figure S1, there is a section on the exterior of the PECVD reactor where monomer samples are placed in a heatable quartz glass jar and three gas tanks (O<sub>2</sub>, N<sub>2</sub>, Ar) with their MFC's connected to the reactor. The vacuum is achieved by dry pump and the pressure of the reactor is regulated by Edwards APG200-XLC NW16 Pirani gauge and ADC controller. The plasma was generated by a 13.56 MHz radio frequency (RF) generator over a matching network with a power range of 1.0 – 300 Watts. There is an infusion system on the inside of the reactor, as well that allows solid samples to be placed and sublimed. Thin film production is carried out by allowing the vapor phase deposition on the surface of substrates placed in an inverted position on the upper wall of the reactor. Before coating the substrates (glass slide, Si wafer and catheters) the reactor evacuated to ~ 25 to 30 mTorr base pressure. Additionally, reaction chamber walls were heated up about 50°C and kept constant through deposition period.

## S2. FTIR analysis of PEG-like thin films

**Table S1.** Percentage of area for functional groups in PEG-like films obtained after different plasma exposure time

| <b>Plasma exposure<br/>time (min)</b> | <b>-CH<sub>2</sub>-</b> | <b>-C-O-C</b> | <b>-C-O-H</b> | <b>-C=O-</b> |
|---------------------------------------|-------------------------|---------------|---------------|--------------|
| <b>15</b>                             | 19.386                  | 7.770         | 55.305        | 1.964        |
| <b>30</b>                             | 20.118                  | 8.500         | 49.385        | 2.604        |
| <b>60</b>                             | 27.858                  | 12.350        | 34.987        | 3.304        |

### S3. Crosslink & Adhesiveness Studies

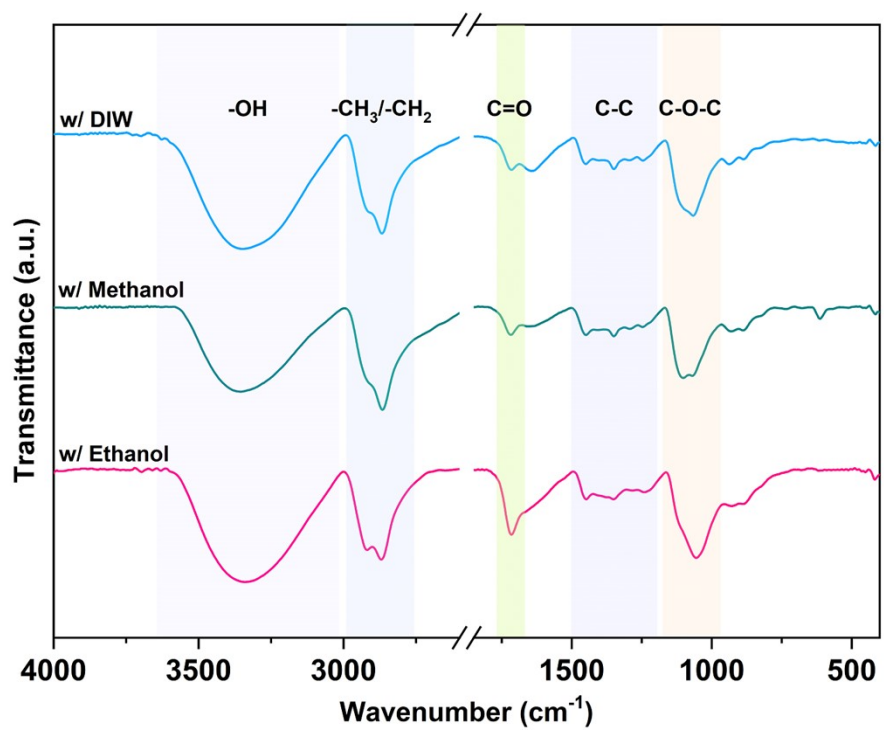

Fig. S3-1. P60-coated surfaces after rinsing with distilled water, methanol and ethanol.

#### S4. XPS Analysis of PEG-like thin films

**Table S2.** C1s XPS Analysis for PEG-like films

|            | <b>-C-O-H</b> | <b>-C=O</b> | <b>-C-O-C-</b> | <b>-C-C-</b> |
|------------|---------------|-------------|----------------|--------------|
| <b>P15</b> | 24.142        | 6.813       | 26.402         | 42.640       |
| <b>P30</b> | 20.503        | 7.334       | 38.387         | 33.774       |
| <b>P60</b> | 17.318        | 8.149       | 40.821         | 33.709       |

## S5. Estimation of surface energy for PEG-like thin films

Owens-Wendt Method:

$$\gamma_{l1}(1 + \cos\theta_1) = 2\sqrt{\gamma_s^d\gamma_{l1}^d} + 2\sqrt{\gamma_s^p\gamma_{l1}^p}$$

$$\gamma_{l2}(1 + \cos\theta_2) = 2\sqrt{\gamma_s^d\gamma_{l2}^d} + 2\sqrt{\gamma_s^p\gamma_{l2}^p}$$

$$\gamma_s = \gamma_s^d + \gamma_s^p$$

Where;

$\gamma_s$  and  $\gamma_l$  are the surface tension of the solid and liquid,

$d$  and  $p$  correspond to dispersion and polar components of the surface tension.

## S6. Antimicrobial/Antifouling Properties of PEG-like Films & SPSS Analysis

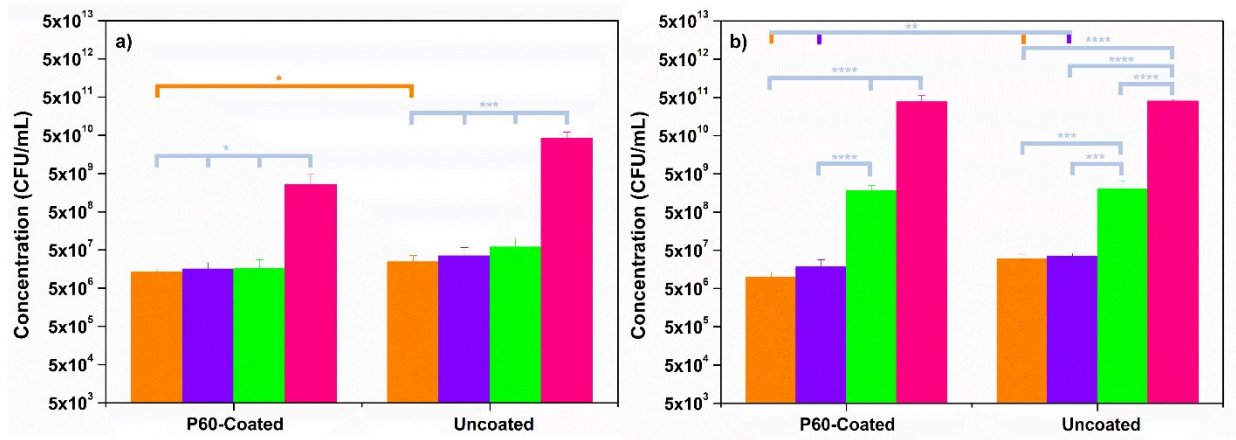

**Fig. S6-1.** Bacteria colonization of *P. mirabilis* a) Bacterial colonies adhered to the P60-coated and uncoated UC surfaces and b) Bacterial colonies not adhered to the P60-coated and uncoated UC surfaces. (n = 6) (\* $p < 0.05$ , \*\* $p < 0.01$ , \*\*\* $p < 0.005$ , \*\*\*\* $p < 0.001$ )

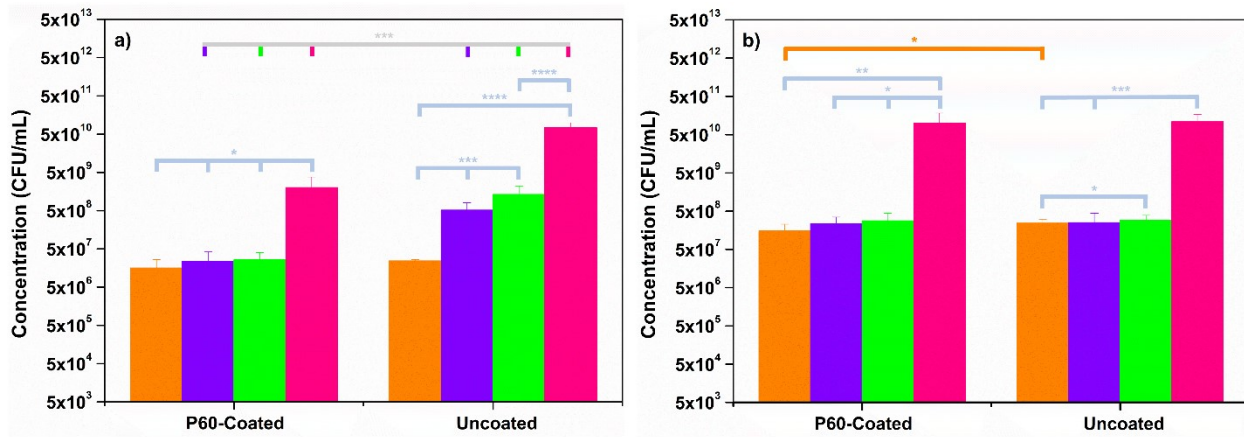

**Fig. S6-2.** Bacteria colonization of *E. coli* a) Bacterial colonies adhered to the P60-coated and uncoated UC surfaces and b) Bacterial colonies not adhered to the P60-coated and uncoated UC surfaces. (n = 6) (\* $p < 0.05$ , \*\* $p < 0.01$ , \*\*\* $p < 0.005$ , \*\*\*\* $p < 0.001$ )
